# Supplementary material for: Upregulation of Potassium Voltage-Gated Channel Subfamily J Member 2 Levels in the Lungs of Patients with Idiopathic Pulmonary Fibrosis
Source: Hindawi journal article supplement (doi:10.1155/2020/3406530), 2020-02-26
Supplement: f1 [file 3406530.f1.pdf]

# Supplemental Figure 1

**A**

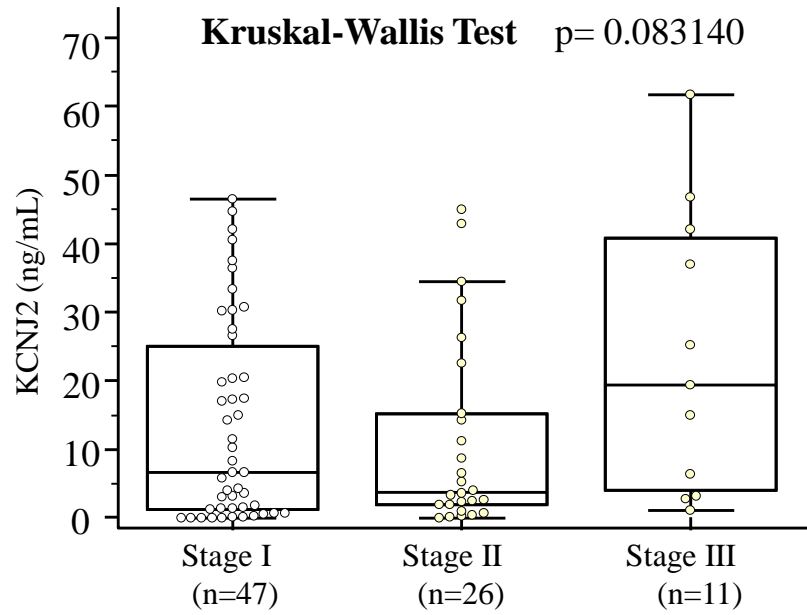

**B**

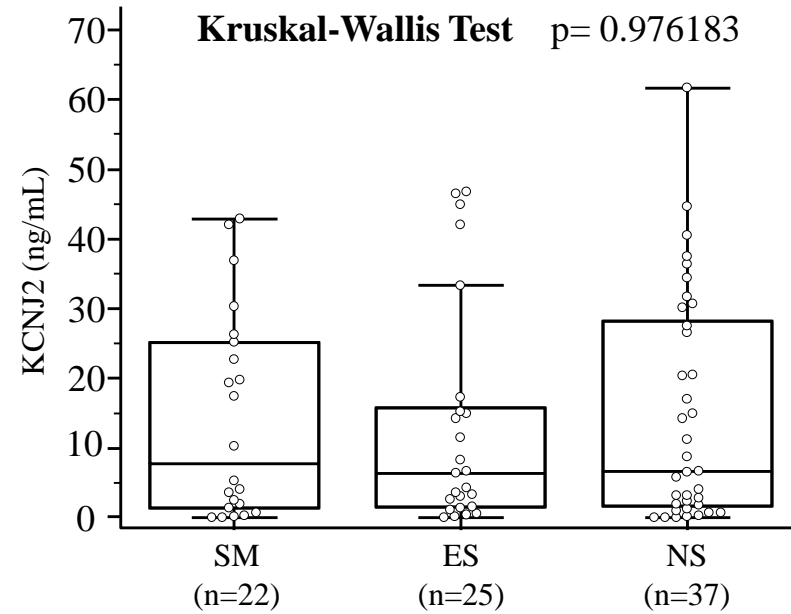

**C**

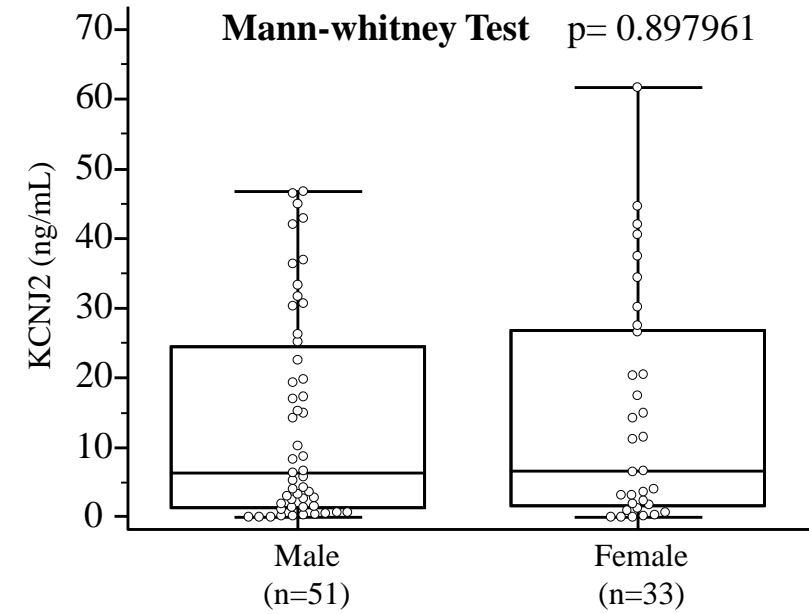

## Supplemental Figure 2

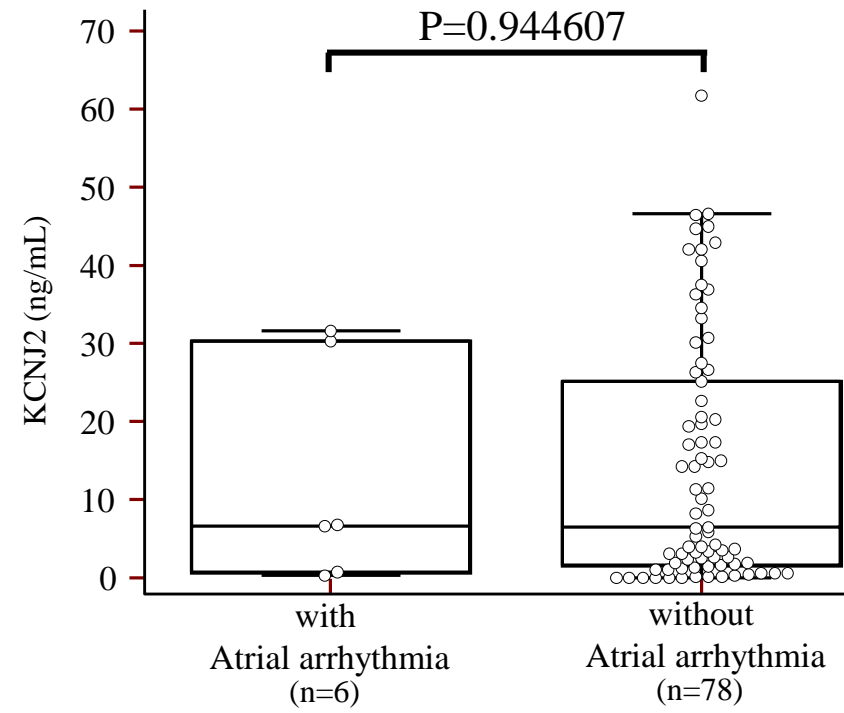

**Supplemental Table 1. Comparison with genotype frequency of KCNJ2 in subjects with idiopathic pulmonary fibrosis with or without atrial arrhythmia**

| Chr | Gene  | Exome-chip | Location | rs ID       | Allele | Frequency              |                           |
|-----|-------|------------|----------|-------------|--------|------------------------|---------------------------|
|     |       |            |          |             |        | with Atrial arrhythmia | without Atrial arrhythmia |
|     |       |            |          |             |        | Major/Hetero/Minor     | Major/Hetero/Minor        |
| 17  | KCNJ2 | exm1349909 | 68171457 | rs147750704 | G>A    | 52/0/0                 | 6/0/0                     |
| 17  | KCNJ3 | exm1349927 | 68171796 | rs141035459 | G>A    | 52/0/0                 | 6/0/0                     |
| 17  | KCNJ4 | exm1349934 | 68172153 | rs202067116 | C>T    | 52/0/0                 | 6/0/0                     |
| 17  | KCNJ5 | exm1349948 | 68172409 | rs141069645 | A>G    | 52/0/0                 | 6/0/0                     |
